# Supplementary material for: Development and Mechanistic Studies of Ternary Nanocomposites for Hydrogen Production from Water Splitting to Yield Sustainable/Green Energy and Environmental Remediation
Source: Polymers (Basel). 2022 Mar 23;14(7):1290. doi: 10.3390/polym14071290 (PMC9003420; doi:10.3390/polym14071290)
Supplement: Supplementary file 1 [file polymers-14-01290-s001.zip › polymers-1551695-supplementary.pdf]

# Development and Mechanistic Studies of Ternary Nanocomposites (AgNPs-S-rGO@g-C<sub>3</sub>N<sub>4</sub>) for Hydrogen Production from Water Splitting to Yield Sustainable/Green Energy and Environmental Remediation

Asim Jilani <sup>1,\*</sup>, Syed Zajif Hussain <sup>2</sup>, Ammar A. Melaibari <sup>1,3</sup> and Nidal H. Abu-Hamdeh <sup>3,4</sup>

<sup>1</sup> Center of Nanotechnology, King Abdulaziz University, 21589 Jeddah, Saudi Arabia; aamelaibari@kau.edu.sa

<sup>2</sup> Department of Chemistry & Chemical Engineering, SBA-School of Science & Engineering (SBA-SSE), Lahore University of Management Sciences (LUMS), Lahore 54792, Pakistan; syed.hussain@lums.edu.pk

<sup>3</sup> Department of Mechanical Engineering, King Abdulaziz University, Jeddah 21589, Saudi Arabia; nabuhamdeh@kau.edu.sa

<sup>4</sup> Center of Research Excellence in Renewable Energy and Power system, King Abdulaziz University, Jeddah 21589, Saudi Arabia

\* Correspondence: asim.jilane@gmail.com; ajilani@kau.edu.sa, Tel.: +966-599693297

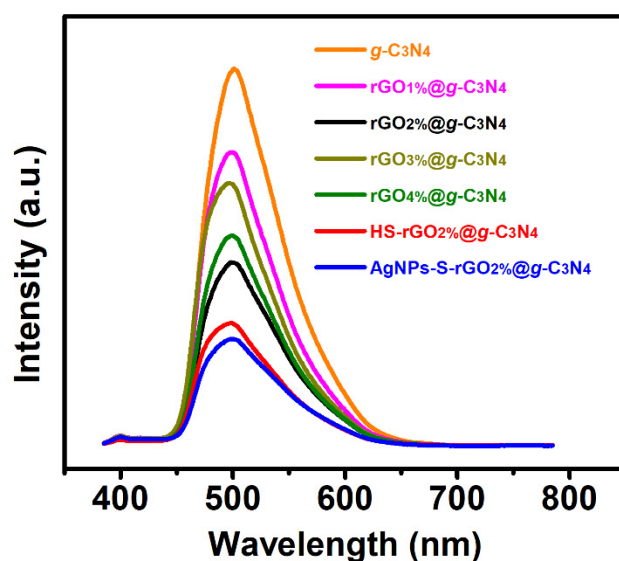

**Figure S1.** Comparison of PL spectra for pure g-C<sub>3</sub>N<sub>4</sub>, its composites with rGO at various concentrations of rGO, further its thiolated composites (HS-rGO<sub>2</sub>%@g-C<sub>3</sub>N<sub>4</sub>) and AgNPs decorated thiolated composites (AgNPs-S-rGO<sub>2</sub>%@g-C<sub>3</sub>N<sub>4</sub>).

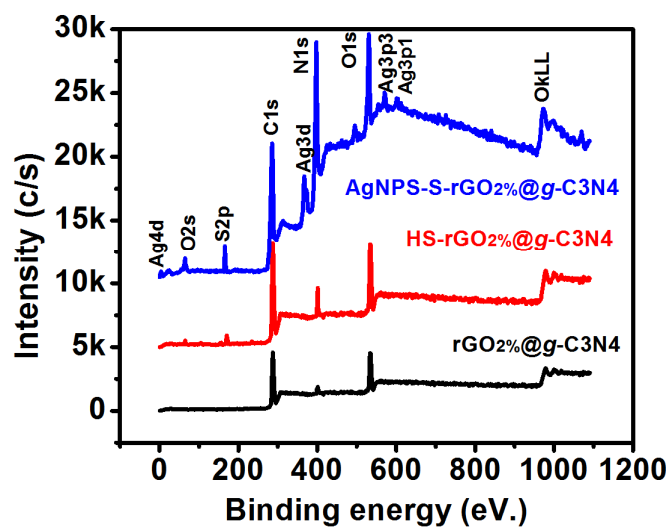

Figure S2. XPS survey spectra for rGO<sub>2</sub>%@g-C<sub>3</sub>N<sub>4</sub>, HS-rGO<sub>2</sub>%@g-C<sub>3</sub>N<sub>4</sub>, and AgNPS-S-rGO<sub>2</sub>%@g-C<sub>3</sub>N<sub>4</sub>.

Table S1. XPS Elemental composition of AgNPS-S-rGO<sub>2</sub>%@g-C<sub>3</sub>N<sub>4</sub> Survey Spectra.

| Element | Atomic Composition |
|---------|--------------------|
| C1s     | 49.8               |
| N1s     | 25.9               |
| O1s     | 18.3               |
| Ag3P3   | 1.1                |
| Ag3d3   | 0.7                |
| S2p     | 4.2                |
